# Supplementary material for: Interplay of septin amphipathic helices in sensing membrane-curvature and filament bundling
Source: PubMed Central journal article supplement — Mol Biol Cell. 2021 Oct 1;32(20):br5. doi: 10.1091/mbc.E20-05-0303 (PMC8684760; doi:10.1091/mbc.e20-05-0303), 2021-10-01
Supplement: mbc-32-br5-s001.pdf [file mbc-32-br5-s001.pdf]

# Supplemental Materials

*Molecular Biology of the Cell*

Woods *et al.*

**A**

Cdc12 + Shs1-capped complex

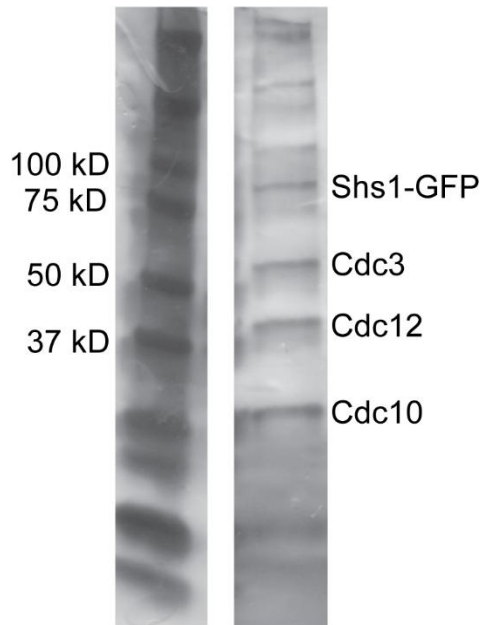**B**

Cdc12-6 Shs1-capped complex

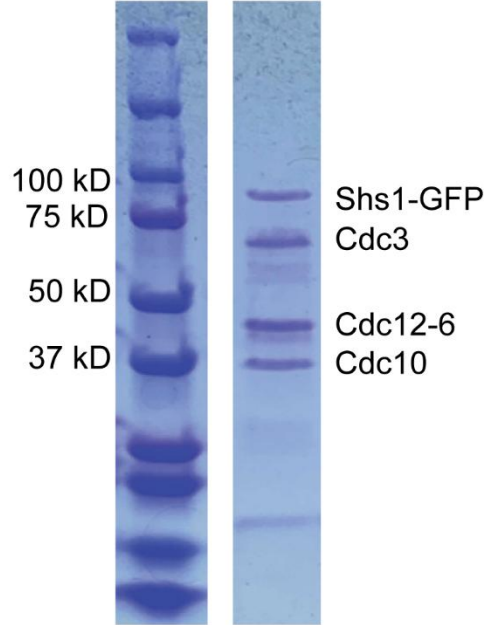**Supplementary Figure 1. Purification of septin complexes**

- A. Silver stain of an SDS-PAGE Shs1-capped wild-type septin complex.
- B. Coomassie blue stain of an SDS-PAGE Shs1-capped cdc12-6 septin complex.

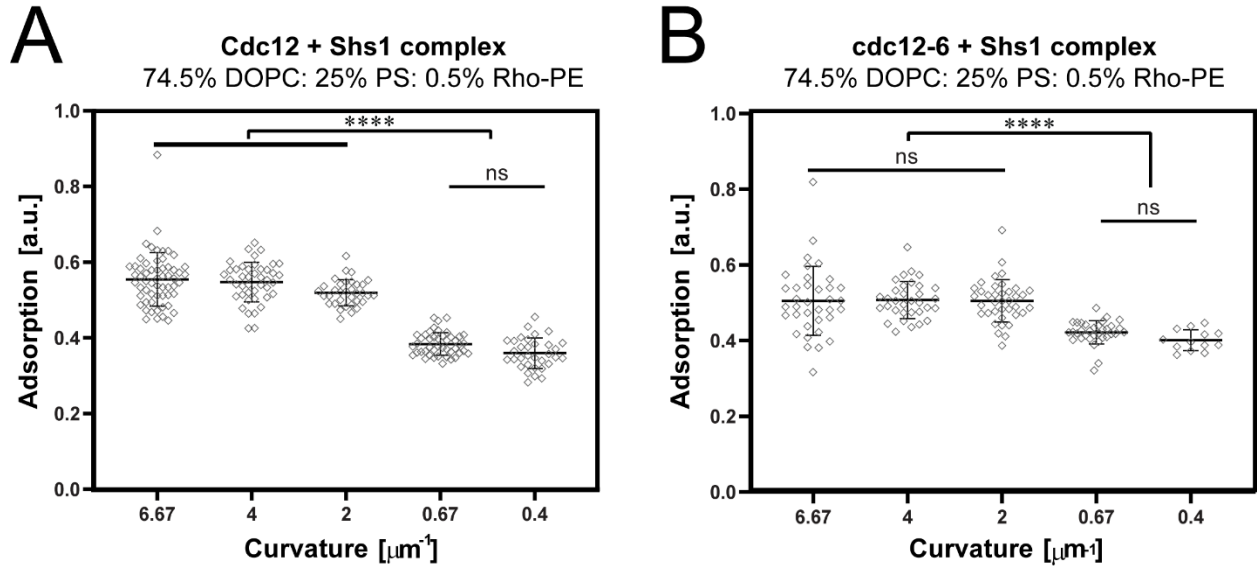

**Supplementary Figure 2. Septin and AH domain curvature preference on different membrane compositions**

- A. Cdc12 + Shs1 septin complex adsorption onto different membrane curvatures (composition is 74.5% DOPC, 25% PS, 0.5% Rhodamine-PE). Bar represents mean, error bar represents stand deviation of the mean (with >30 beads of each curvature measured across three replicates). Adsorption on membrane curvatures of 6.7, 4, or 2  $\mu\text{m}^{-1}$  was greater than adsorption on curvatures of 0.67 or 0.4  $\mu\text{m}^{-1}$  \*\*\*\*( $p < 0.0001$ ). **ns**, adsorption was not significantly different.
- B. Shs1 septin complex with mutant cdc12-6 adsorption onto different membrane curvatures (composition is 74.5% DOPC, 25% PS, 0.5% Rhodamine-PE). Bar represents mean, error bar represents stand deviation of the mean (with >30 beads of each curvature measured across three replicates). Adsorption on membrane curvatures of 6.7, 4, or 2  $\mu\text{m}^{-1}$  was greater than adsorption on curvatures of 0.67 or 0.4  $\mu\text{m}^{-1}$  \*\*\*\*( $p < 0.0001$ ). **ns**, adsorption was not significantly different.

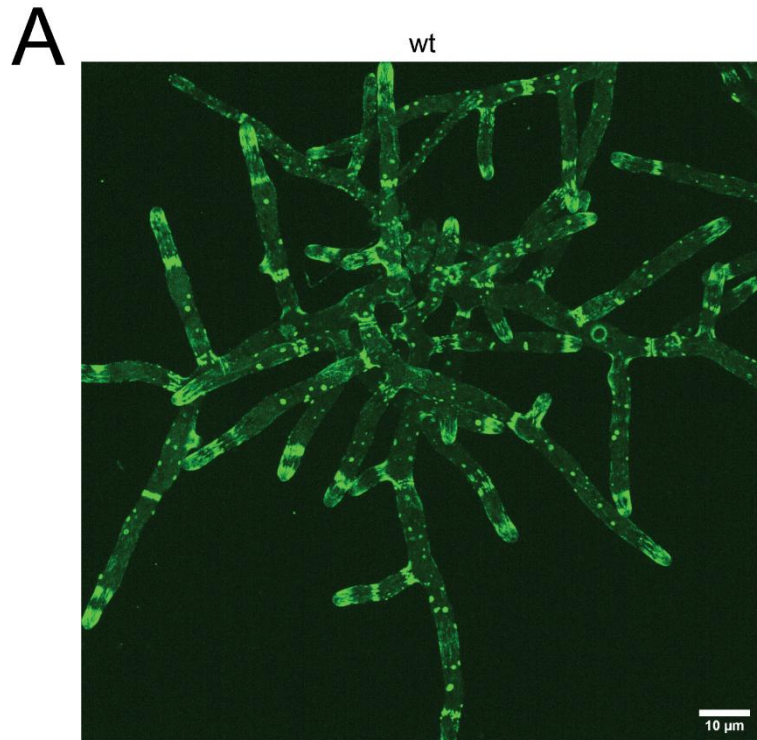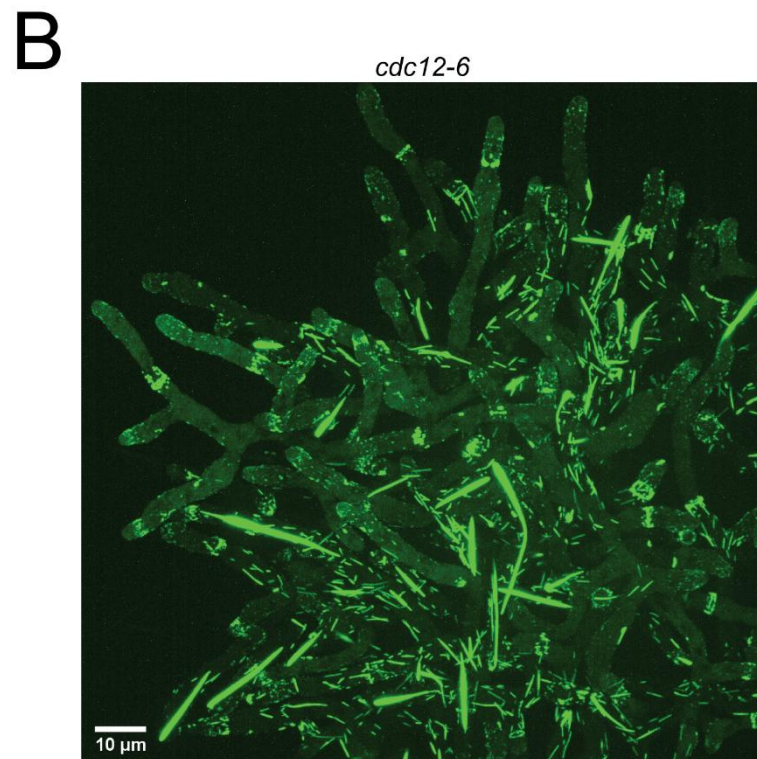

**Supplementary Figure 3. Comparing septin structures in wild-type and *cdc12-6* mutant *Ashbya gossypii* cells**

A-B. Maximum projection images of wild-type cells (Cdc11a-GFP) and *cdc12-6* (*cdc12-6*-GFP) mutants grown at permissive temperature for 16-20 hours. Scale bars, 10μm.

**Table S1. Yeast strains used in this study.**

| <b>STRAIN</b> | <b>RELEVANT GENOTYPE</b>                                                                      | <b>SOURCE</b> |
|---------------|-----------------------------------------------------------------------------------------------|---------------|
| AGY411        | MATa/ $\alpha$ <i>shs1::HIS3/SHS1 cdc12-6/CDC12 CDC3-mCherry:LEU2/CDC3 BEM1-GFP:LEU2/BEM1</i> | Daniel Lew    |
| AGY436        | MATa/ $\alpha$ <i>shs1<sup>Δ488-551</sup>-GFP:HIS3/SHS1 cdc12-6/CDC12</i>                     | This study    |
| AGY441        | MATa/ $\alpha$ <i>SHS1-GFP:HIS3/SHS1</i>                                                      | This study    |
| AGY444        | MATa/ $\alpha$ <i>shs1<sup>Δ341-551</sup>-GFP:HIS3/SHS1</i>                                   | This study    |
| AGY450        | MATa/ $\alpha$ <i>shs1<sup>Δ488-551</sup>-GFP:HIS3/SHS1</i>                                   | This study    |
| AGY453        | MATa/ $\alpha$ <i>shs1<sup>Δ506-551</sup>-GFP:HIS3/SHS1</i>                                   | This study    |
| AGY460        | MATa/ $\alpha$ <i>SHS1-GFP:HIS3/SHS1 cdc12-6/CDC12</i>                                        | This study    |
| AGY462        | MATa/ $\alpha$ <i>shs1<sup>Δ341-551</sup>-GFP:HIS3/SHS1 cdc12-6/CDC12</i>                     | This study    |
| AGY463        | MATa/ $\alpha$ <i>shs1<sup>Δ488-551</sup>-GFP:HIS3/SHS1 cdc12-6/CDC12</i>                     | This study    |
| AGY464        | MATa/ $\alpha$ <i>shs1<sup>Δ506-551</sup>-GFP:HIS3/SHS1 cdc12-6/CDC12</i>                     | This study    |
| AGY478        | MATa/ $\alpha$ <i>cdc12-6-3xHA:TRP1/CDC12</i>                                                 | This study    |
| AGY479        | MATa/ $\alpha$ <i>cdc12-6-(SpoVM-AH)-3xHA:TRP1/CDC12</i>                                      | This study    |
| AGY481        | MATa/ $\alpha$ <i>cdc12-6-(SHS1<sup>488-505</sup>)-3xHA:TRP1/CDC12</i>                        | This study    |
| AGY482        | MATa/ $\alpha$ <i>cdc12-6-(RVS161-AH)-3xHA:TRP1/CDC12</i>                                     | This study    |
| AGY484        | MATa/ $\alpha$ <i>cdc12-6-(RVS167-AH)-3xHA:TRP1/CDC12</i>                                     | This study    |
| AGY493        | MATa/ $\alpha$ <i>shs1<sup>Δ523-551</sup>:HIS3/SHS1 cdc12-6/CDC12</i>                         | This study    |
| AGY494        | MATa <i>shs1<sup>Δ523-551</sup>:HIS3 cdc12-6</i>                                              | This study    |
| AGY496        | MATa/ $\alpha$ <i>shs1<sup>Δ341-551</sup>:HIS3/SHS1 cdc12-6/CDC12</i>                         | This study    |
| AGY498        | MATa/ $\alpha$ <i>shs1<sup>Δ488-551</sup>:HIS3/SHS1 cdc12-6/CDC12</i>                         | This study    |
| AGY500        | MATa/ $\alpha$ <i>shs1<sup>Δ506-551</sup>:HIS3/SHS1 cdc12-6/CDC12</i>                         | This study    |
| AGY502        | MATa/ $\alpha$ <i>shs1<sup>Δ508-551</sup>:HIS3/SHS1 cdc12-6/CDC12</i>                         | This study    |
| AGY508        | MATa <i>shs1<sup>Δ488-551</sup>:HIS3 cdc12-6</i>                                              | This study    |
| AGY512        | MATa <i>shs1<sup>Δ506-551</sup>:HIS3 cdc12-6</i>                                              | This study    |
| AGY516        | MATa <i>shs1<sup>Δ508-551</sup>:HIS3 cdc12-6</i>                                              | This study    |
| AGY524        | MATa <i>cdc12-6 CDC3-mCherry:LEU2 bar1::URA3</i>                                              | This study    |
| AGY533        | MATa/ $\alpha$ <i>cdc12<sup>ΔAH</sup>-3xHA:TRP1/CDC12</i>                                     | This study    |
| AGY534        | MATa/ $\alpha$ <i>cdc12<sup>Δ400-407</sup>-3xHA:TRP1/CDC12</i>                                | This study    |
| AGY537        | MATa/ $\alpha$ <i>cdc12<sup>ΔAH</sup>-(SpoVM-AH)-3xHA:TRP1/CDC12</i>                          | This study    |
| AGY538        | MATa/ $\alpha$ <i>cdc12<sup>ΔAH</sup>-(SHS1<sup>488-505</sup>)-3xHA:TRP1/CDC12</i>            | This study    |
| AGY540        | MATa/ $\alpha$ <i>cdc12<sup>ΔAH</sup>-(RVS167-AH)-3xHA:TRP1/CDC12</i>                         | This study    |
| AGY541        | MATa/ $\alpha$ <i>cdc12<sup>ΔAH</sup>-(S.p.RITC-AH)-3xHA:TRP1/CDC12</i>                       | This study    |
| AGY542        | MATa/ $\alpha$ <i>cdc12<sup>ΔAH</sup>-(SHS1<sup>488-507</sup>)-3xHA:TRP1/CDC12</i>            | This study    |
| AGY548        | MATa/ $\alpha$ <i>shs1<sup>Δ488-507</sup>-GFP:HIS3/SHS1 cdc12-6/CDC12</i>                     | This study    |

Yeast strains were in the YEF473 genetic background (*his3-Δ200, leu2-Δ1, lys2-801, trp1-Δ63, ura3-5*; Bi and Pringle, 1996).

**Table S2. Plasmids used in this study.**

| NAME     | DESCRIPTION                                | SELECTION MARKER |
|----------|--------------------------------------------|------------------|
| AGB 548  | pMVB133 ScCDC3/ ScSHS1-GFP                 | CAM              |
| AGB 710  | pMVB128 6-HIS-TEV-ScCDC12/ScCDC10          | AMP              |
| AGB 1055 | pRSET-A-His-F2-2xCDC12-AHD-GFP             | AMP              |
| AGB 1084 | pUC57 2xScShs1AH-GFP                       | AMP              |
| AGB 1204 | pET-duet-6HIS-TEV-ScCDC12-6/ScCDC10        | AMP              |
| AGB1205  | pET-duet-6HIS-TEV-ScCDC12-6-SpoVM/ScCDC10  | AMP              |
| AGB 1388 | pMVB133 ScCDC3/ ScSHS1 <sup>ΔAH</sup> -GFP | CAM              |
